# Supplementary material for: Linking genetic determinants with salinity tolerance and ion relationships in eggplant, tomato and pepper
Source: PubMed Central journal article supplement (PMC8357798; doi:10.1038/s41598-021-95506-5), 2021-08-11
Supplement: 41598_2021_95506_MOESM1_ESM.pdf [file 41598_2021_95506_MOESM1_ESM.pdf]

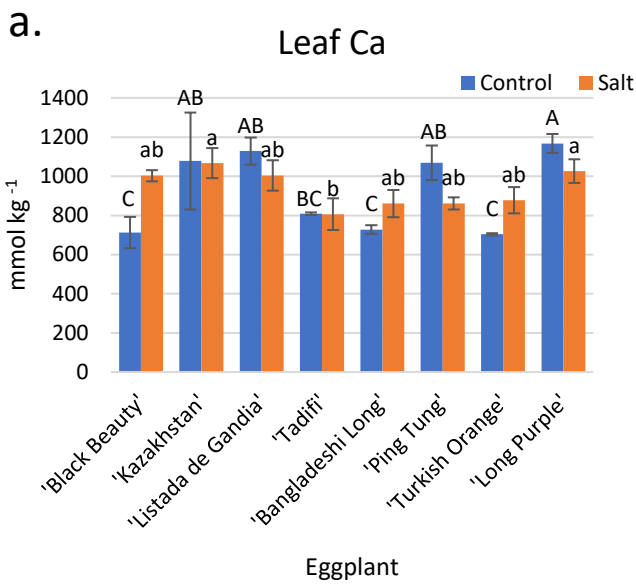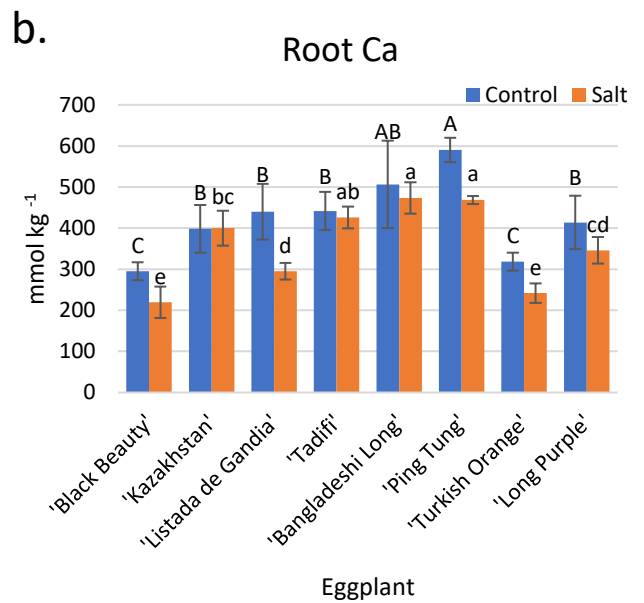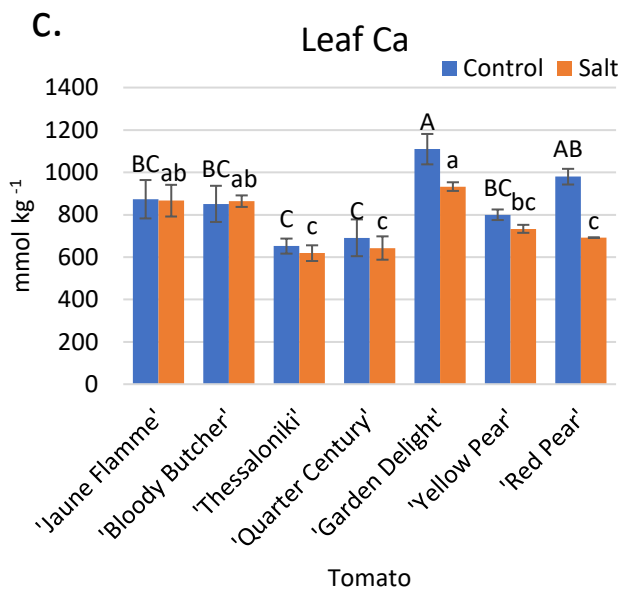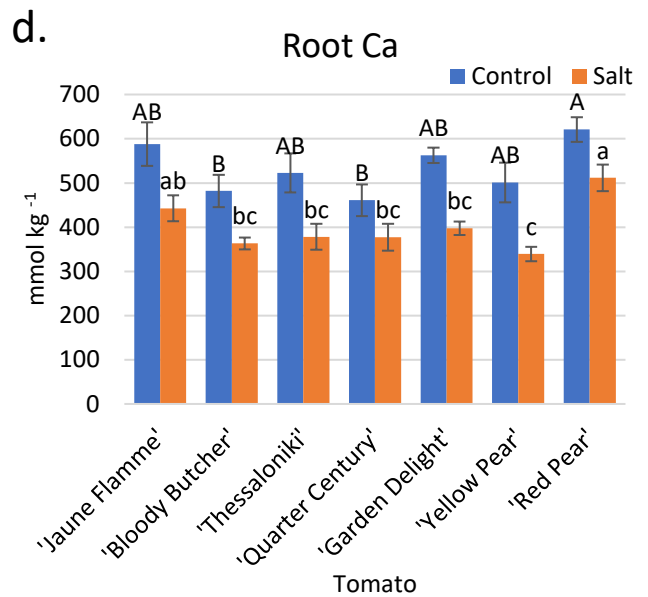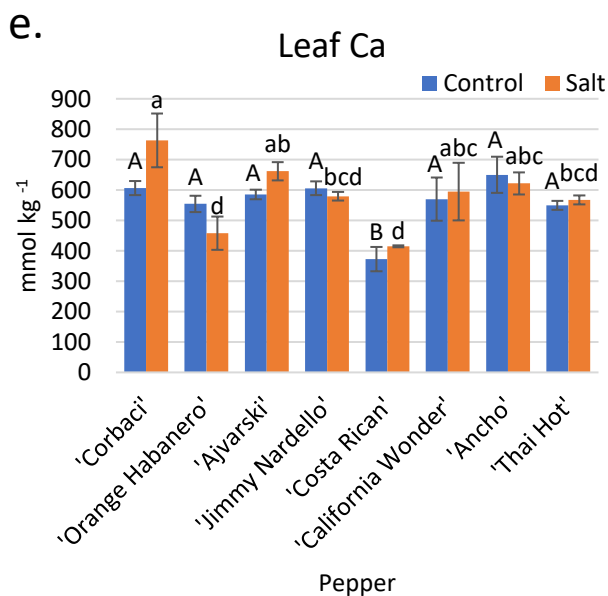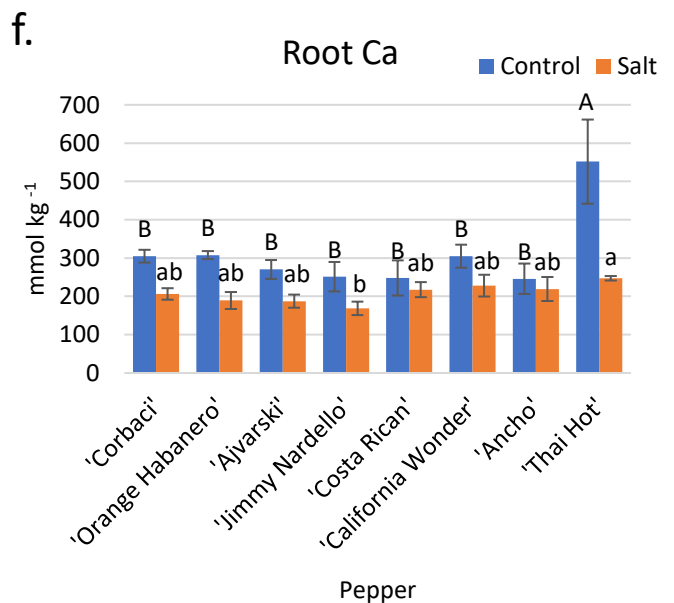

Supplementary Figure S1. Tissue Ca concentrations of different cultivars of eggplant, tomato, and pepper. a) Eggplant leaf Ca concentrations. b) Eggplant root Ca concentrations. c) Tomato Leaf Ca concentrations. d) Tomato root Ca concentrations. e) Pepper leaf Ca concentrations. f) Pepper root Ca concentrations. Capital letters denote significant differences among cultivars under control condition ( $p < 0.05$ ). Lowercase letters denote significant differences among cultivars under saline conditions ( $p < 0.05$ ). Error bars represent standard errors.

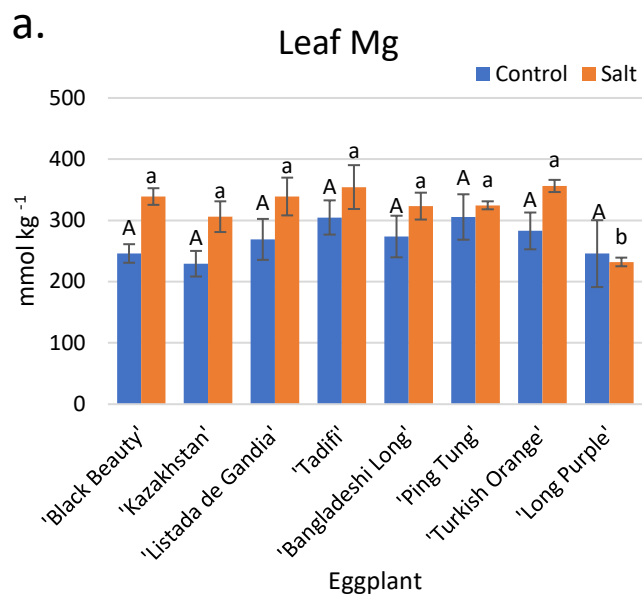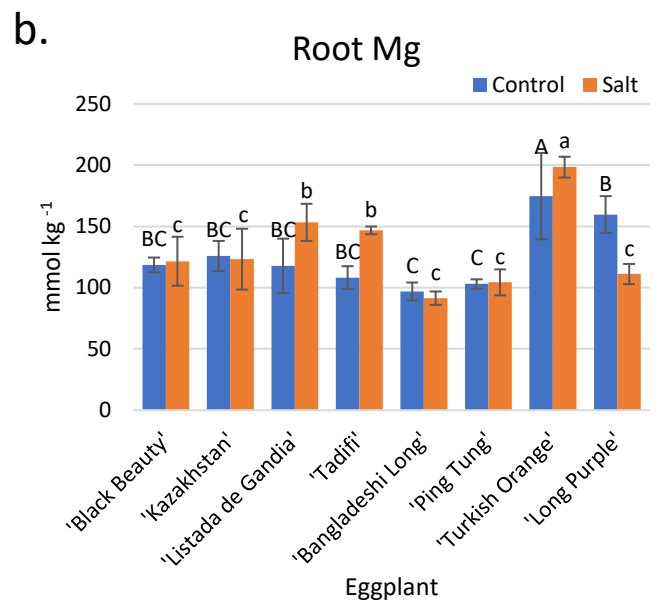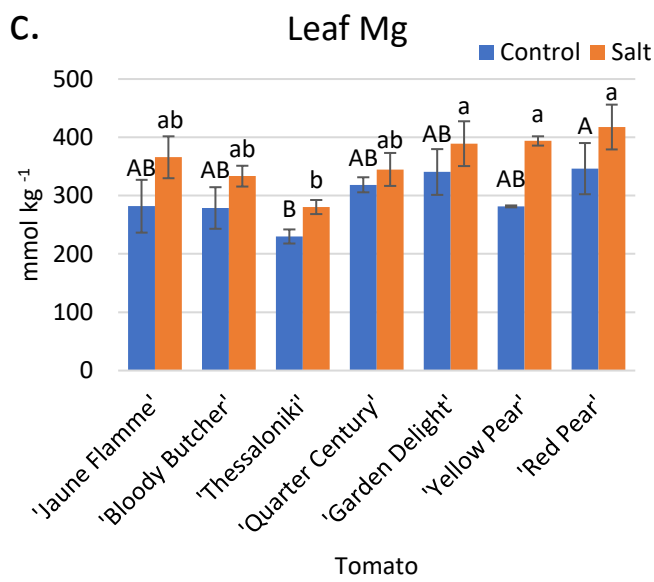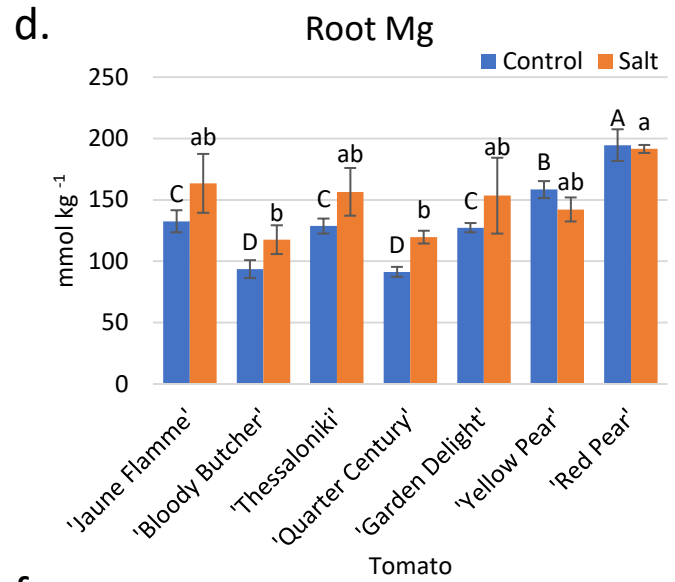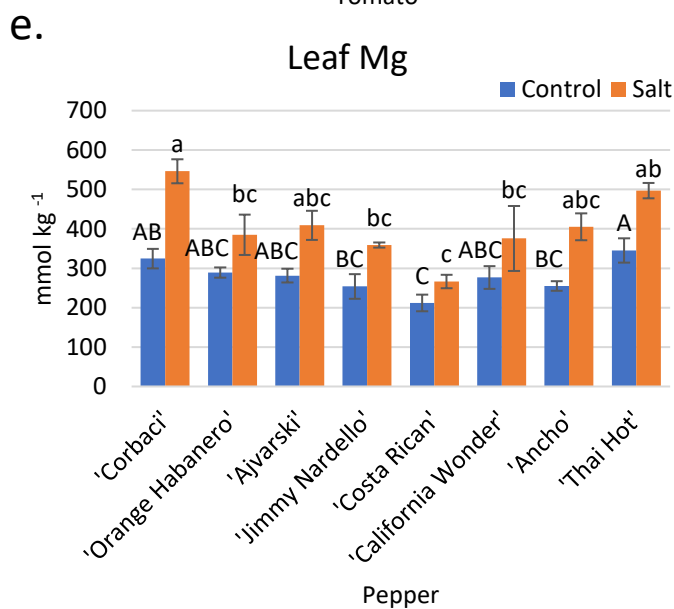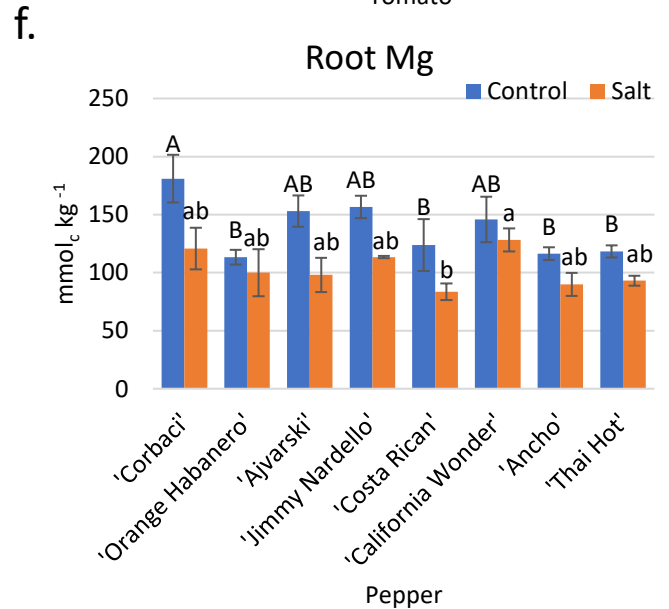

Supplementary Figure S2. Tissue Mg concentrations of different cultivars of eggplant, tomato, and pepper. a) Eggplant leaf Mg concentrations. b) Eggplant root Mg concentrations. c) Tomato Leaf Mg concentrations. d) Tomato root Mg concentrations. e) Pepper leaf Mg concentrations. f) Pepper root Mg concentrations. Capital letters denote significant differences among cultivars under control condition ( $p < 0.05$ ). Lowercase letters denote significant differences among cultivars under saline conditions ( $p < 0.05$ ). Error bars represent standard errors.

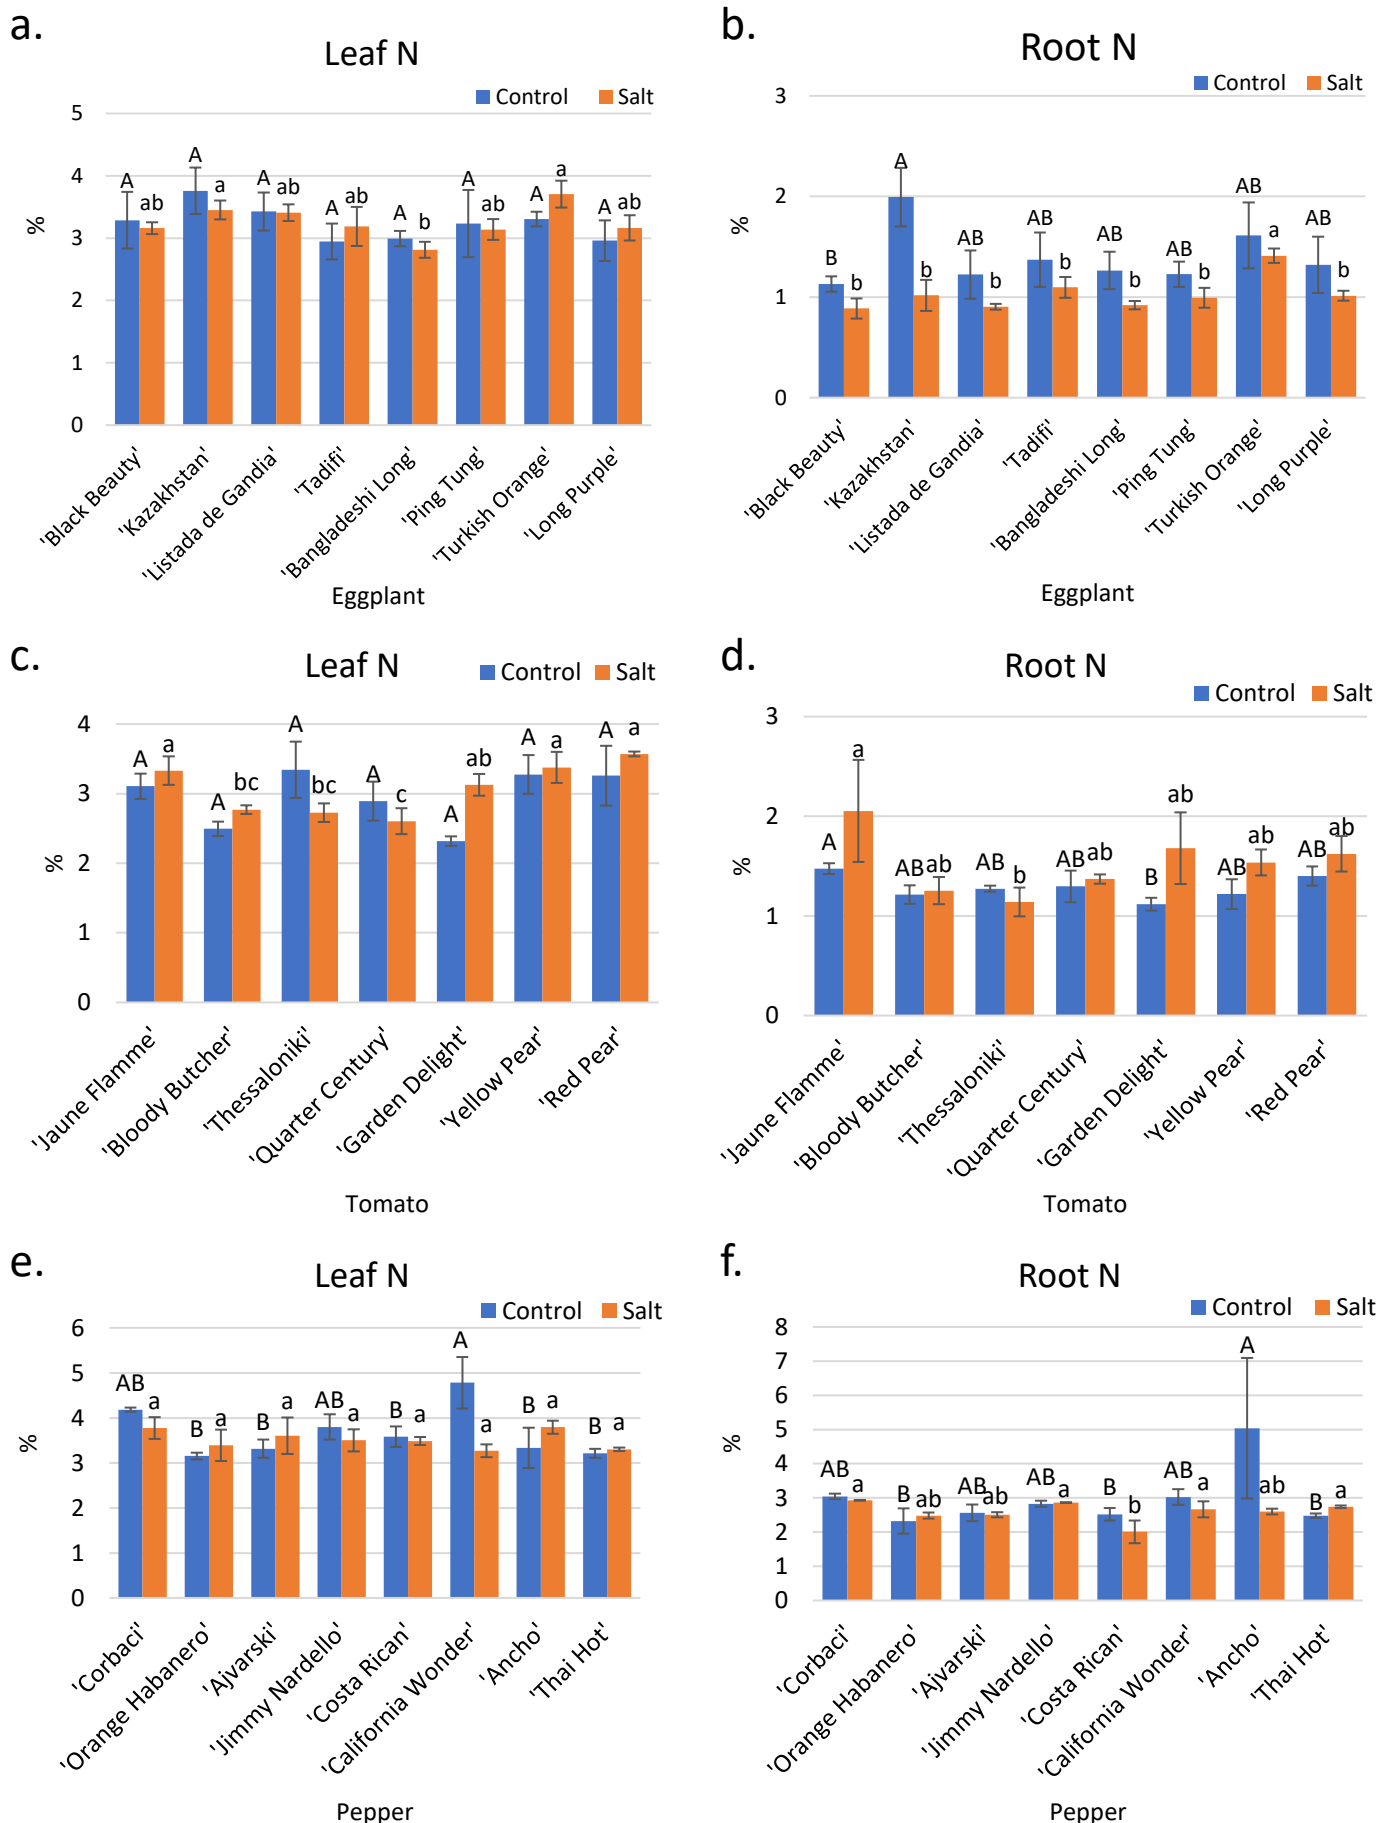

Supplementary Figure S3. Tissue N concentrations of different cultivars of eggplant, tomato, and pepper. a) Eggplant leaf N concentrations. b) Eggplant root N concentrations. c) Tomato Leaf N concentrations. d) Tomato root N concentrations. e) Pepper leaf N concentrations. f) Pepper root N concentrations. Capital letters denote significant differences among cultivars under control condition ( $p < 0.05$ ). Lowercase letters denote significant differences among cultivars under saline conditions ( $p < 0.05$ ). Error bars represent standard errors.

Supplementary Table S1. List of primers used for qRT-PCR analyses of eggplant, tomato, and pepper

| <b>Crop</b> | <b>Gene</b>     | <b>Primer Name</b> | <b>Sequence (5' to 3')</b>   |
|-------------|-----------------|--------------------|------------------------------|
| Eggplant    | <i>SmAKT1</i>   | Sm_AKT1_F          | TCCAGCTGGTCTCCGAG            |
|             |                 | Sm_AKT1_R          | ACTAGATCCACAGCTCCTGTTA       |
|             | <i>SmAVP1</i>   | Sm_AVP1_F          | GGAAAGGGATTGCCATTGG          |
|             |                 | Sm_AVP1_R          | CTTGGGGGTCAAGACATCG          |
|             | <i>SmNHX1</i>   | Sm_NHX1_F          | ATTTTGGCAGGCACTCCA           |
|             |                 | Sm_NHX1_R          | CACTTAAATAGAATAGTTCAGCCAACA  |
|             | <i>SmNHX2</i>   | Sm_NHX2_F          | ATATCATTAGCTGCTATTGGCATT     |
|             |                 | Sm_NHX2_R          | TTGCTCCAATCGCTAGGTAATC       |
|             | <i>SmSOS1</i>   | Sm_SOS1_F          | AGCATGATAAGCAACACAAGAAG      |
|             |                 | Sm_SOS1_R          | CGATCTGGTCTAACTTCTGGAAA      |
|             | <i>SmSOS2</i>   | Sm_SOS2_F          | GGCTTCACGAGGTTTTAGCT         |
|             |                 | Sm_SOS2_R          | GATGAACAATTTTATCAAAAAGCTCTCC |
|             | <i>SmSOS3</i>   | Sm_SOS3_F          | GACAGCTTTTACGGAGAGTGA        |
|             |                 | Sm_SOS3_R          | CTTCCTTGTGAATTAGTCCATCATC    |
|             | <i>SmALMT9</i>  | Sm_ALMT9_F         | CTAGAAGGTTGTATCAGTGAATATCTGA |
|             |                 | Sm_ALMT9_R         | CTGCTGATCTGTAGCCATTGT        |
|             | <i>SmCCC</i>    | Sm_CCC_F           | GCCATGAAGGGTGGTGG            |
|             |                 | Sm_CCC_R           | ACATACATTGCACCACCAATTG       |
|             | <i>SmCLCc</i>   | Sm_CLCc_F          | GCTTCATGGTGGCGAAGT           |
|             |                 | Sm_CLCc_R          | CAGAATTGAATGCAAGATCTGAGT     |
|             | <i>SmCLCg</i>   | Sm_CLCg_F          | GAACGAGAGAAGAGCTGCTTAC       |
|             |                 | Sm_CLCg_R          | AGGATGGCAAGGTGCAAA           |
|             | <i>SmSLAH3</i>  | Sm_SLAH3_F         | GCTAAGGGCTTCTGAGGAAAG        |
|             |                 | Sm_SLAH3_R         | GCCAAGAATGATACCAAACGATG      |
|             | <i>SmCYP</i>    | Sm_CYP_F           | ATCCTGTCCATGGCTAATGC         |
|             |                 | Sm_CYP_R           | ATGCCCTCAACAACCTTGTC         |
|             | <i>Sm18cRNA</i> | Sm_18sRNA_F        | TAGTTGGACTTTGGGATGGC         |
|             |                 | Sm_18sRNA_R        | AGAGCGTAGGCTTGCTTTGA         |
|             | <i>SmGAPDH</i>  | Sm_GAPDH_F         | CCGCTCCTAGCAAAGATGCC         |
|             |                 | Sm_GAPDH_R         | ACCCTCCACAATGCCAAACC         |
| Tomato      | <i>SlAKT1</i>   | Sl_AKT1_F          | CGCGTTGCATATCGCTG            |
|             |                 | Sl_AKT1_R          | GCCTTCTGAATCTCTACTATTGGG     |
|             | <i>SlAVP1</i>   | Sl_AVP1_F          | AAGAATTGGGAGCTCTTTTTATGTG    |
|             |                 | Sl_AVP1_R          | TTGGACAGGGCTGTAAGC           |
|             | <i>SlNHX1</i>   | Sl_NHX1_F          | ATGCAGGGTTCCAGGTAAAA         |
|             |                 | Sl_NHX1_R          | GAATGGCACCTAATGATATAATGGC    |
|             | <i>SlNHX2</i>   | Sl_NHX2_F          | TATCATTCCGGTGTACTAGCATTT     |
|             |                 | Sl_NHX2_R          | GATTGCTCCAATAGCAAGGTAATC     |
|             | <i>SlSOS1</i>   | Sl_SOS1_F          | CCGTATCTGGGCAAACATTG         |
|             |                 | Sl_SOS1_R          | CTGCACACCTCTTTATCTGGT        |
|             | <i>SlSOS2</i>   | Sl_SOS2_F          | GAGATTTGAAGCCTGAAAATTTGC     |
|             |                 | Sl_SOS2_R          | TCGACTCCTTGTTGAGGC           |
|             | <i>SlSOS3</i>   | Sl_SOS3_F          | GAGACCGCTTTTACGGTGAG         |
|             |                 | Sl_SOS3_R          | GCTGAAATTCTTCTTGTGAATTAGT    |

|        |                 |             |                                |
|--------|-----------------|-------------|--------------------------------|
|        | <i>SIALMT9</i>  | Sl_ALMT9_F  | CAGTATTGGAGCCACTCTAAGC         |
|        |                 | Sl_ALMT9_R  | CTTCCCATTCTCCAGCCAAT           |
|        | <i>SICCC</i>    | Sl_CCC_F    | TGGAGCAATGTATGTATTGGGA         |
|        |                 | Sl_CCC_R    | GTGACAGTTTCTCTAAGAATTCAG       |
|        | <i>SICLCc</i>   | Sl_CLCc_F   | GCCTCGACTATGATATTGTAGAAAATG    |
|        |                 | Sl_CLCc_R   | AGAGCACAAGAGTCCATTTAAGA        |
|        | <i>SICLCg</i>   | Sl_CLCg_F   | GCGAGAAGGTATAACAACGGC          |
|        |                 | Sl_CLCg_R   | CAGCCTCTGGTGCGATAAA            |
|        | <i>SISLAH3</i>  | Sl_SLAH3_F  | CCTGTCGTGGTAACTGAAGC           |
|        |                 | Sl_SLAH3_R  | GAGTAACCAGCCAAAGGAGAG          |
|        | <i>SIACT</i>    | Sl_ACTIN_F  | GAAATAGCATAAGATGGCAGACG        |
|        |                 | Sl_ACTIN_R  | ATACCCACCATCACACCAGTAT         |
|        | <i>SIPP2Acs</i> | Sl_PP2Acs_F | CGATGTGTGATCTCCTATGGTC         |
|        |                 | Sl_PP2Acs_R | AAGCTGATGGGCTCTAGAAATC         |
|        | <i>SIRPL2</i>   | Sl_RPL2_F   | GTCATCCTTTTCAGGTACAAGCA        |
|        |                 | Sl_RPL2_R   | CGTTACAAACAACAGCTCCTTC         |
| Pepper | <i>CaAKT1</i>   | Ca_AKT1_F   | CCTCAACTATTTACAGTACGAACGA      |
|        |                 | Ca_AKT1_R   | ATTATTCATGATTATAGTCCCGTCCC     |
|        | <i>CaAVP1</i>   | Ca_AVP1_F   | GTCAGCTCTGTGCGGCATC            |
|        |                 | Ca_AVP1_R   | GTTGCTTCTTCAATGCTGGC           |
|        | <i>CaNHX1</i>   | Ca_NHX1_F   | TGCAGGGTTTCAGGTAAAAAAG         |
|        |                 | Ca_NHX1_R   | AAAGGCACCTAATGTTATAATTGCA      |
|        | <i>CaNHX2</i>   | Ca_NHX2_F   | TCATTCTTCCGCAATTTTCAGC         |
|        |                 | Ca_NHX2_R   | GAAAATGCCAATAGCACATAAAGATATG   |
|        | <i>CaSOS1</i>   | Ca_SOS1_F   | GTTGCTTGGTGGGCTTCTA            |
|        |                 | Ca_SOS1_R   | CATCAATGACTCGCCTTCGA           |
|        | <i>CaSOS2</i>   | Ca_SOS2_F   | CCTCAGAATCGTTGGGTCTTAA         |
|        |                 | Ca_SOS2_R   | GCAAATTGACCGGCCCTA             |
|        | <i>CaSOS3</i>   | Ca_SOS3_F   | GAGTGATGAAAAGATAGATCAAGATGA    |
|        |                 | Ca_SOS3_R   | GCTAAAGTAATATCCTTTAGATATGGAAGG |
|        | <i>CaALMT9</i>  | Ca_ALMT9_F  | CATAACAGGTTTTTTTATCACTTATGCAA  |
|        |                 | Ca_ALMT9_R  | AACCGGATACCATGATGAAACA         |
|        | <i>CaCCC</i>    | Ca_CCC_F    | GCTGAAGTTATCGTCATTTCAATGA      |
|        |                 | Ca_CCC_R    | CTAACAACCTCTTCGTTGTGCAG        |
|        | <i>CaCLCc</i>   | Ca_CLCc_F   | GACAAATTCAGAGAGTGGTGGTA        |
|        |                 | Ca_CLCc_R   | GTAAACGTTGGCTCCAACAATAG        |
|        | <i>CaCLCg</i>   | Ca_CLCg_F   | GTACCTGCTGGATATAATGCCT         |
|        |                 | Ca_CLCg_R   | TCCACTGTGTCTCTATGGTCTA         |
|        | <i>CaCaAH3</i>  | Ca_SLAH3_F  | AGCAAGCTGAAGGATAAAAGATTTG      |
|        |                 | Ca_SLAH3_R  | ACGGACTCTTGTTCTATTTCTTG        |
|        | <i>CaACT</i>    | Ca_Actin_F  | CCCAGATTATGTTTGAGACC           |
|        |                 | Ca_Actin_R  | GCAAAGCATAACCCTCATAG           |
|        | <i>CaACT1</i>   | Ca_Actin1_F | GTCTCTTCCAACCATCCAT            |
|        |                 | Ca_Actin1_R | TACTTTCTCTCTGGTGGTGC           |
|        | <i>CaGAPDH</i>  | Ca_GAPDH_F  | ACCGCAACCCCATCAATCT            |
|        |                 | Ca_GAPDH_R  | CCAGTGTAGGAGTGTGTAG            |
